# Supplementary material for: Rhodomyrtone as a New Natural Antibiotic Isolated from Rhodomyrtus tomentosa Leaf Extract: A Clinical Application in the Management of Acne Vulgaris
Source: MDPI journal article supplement (doi:10.3390/antibiotics10020108), 2021-01-22
Supplement: s1 [file s1]

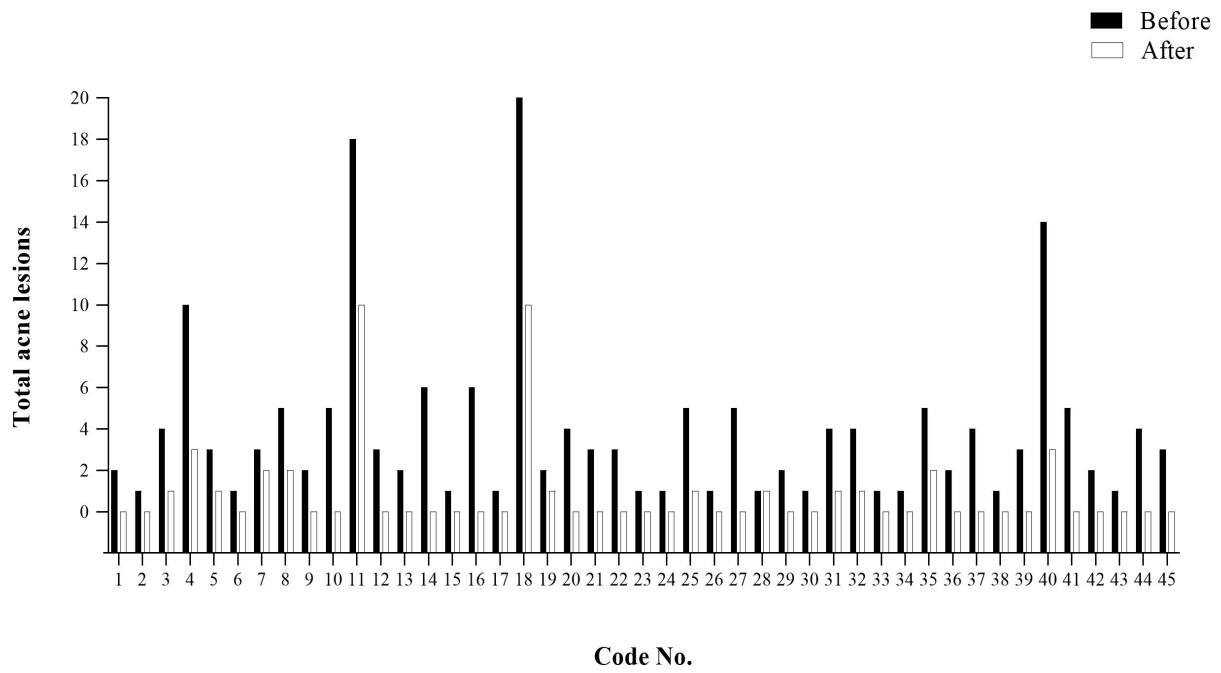

**Figure S1.** Quality of inflammatory acne lesions.

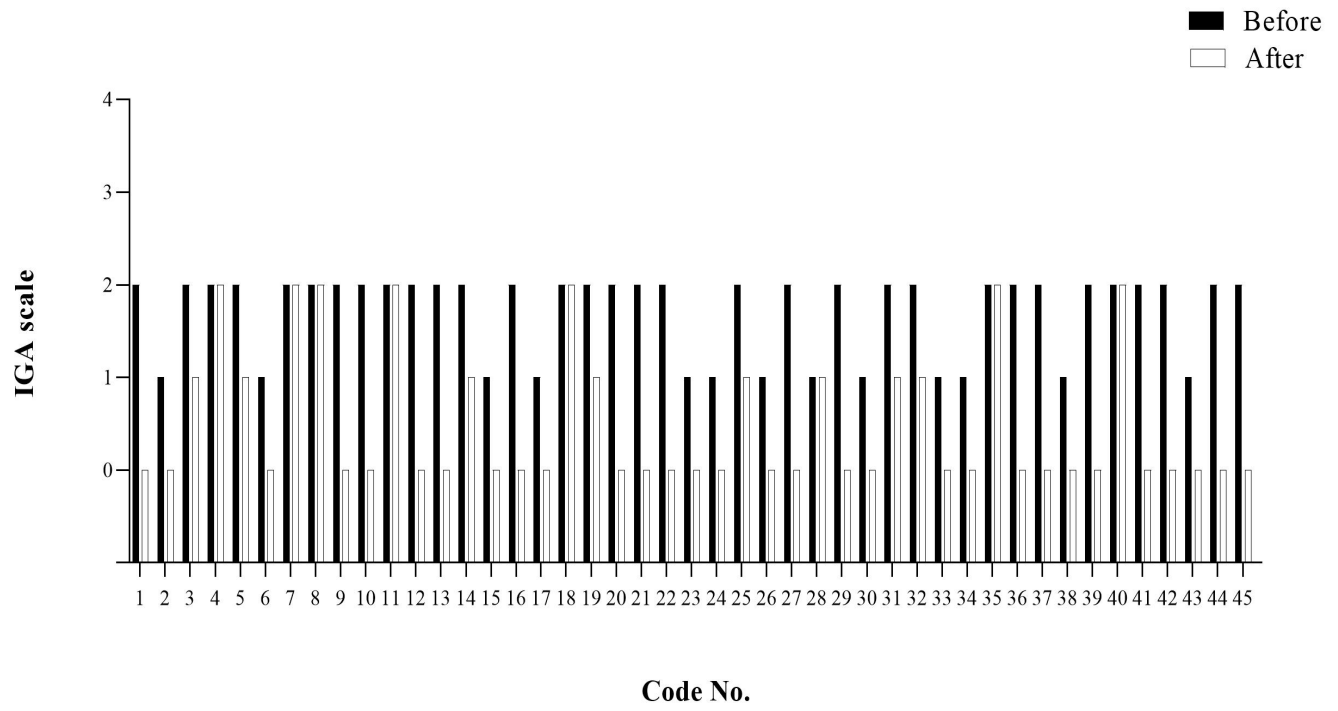

**Figure S2.** Quality of investigation’s global assessment.
